# Supplementary material for: Fabrication of high-surface-area mesoporous frameworks of β-Ni(OH)2–CdIn2S4 p–n nano-heterojunctions for improved visible light photocatalytic hydrogen production
Source: Royal Society of Chemistry journal article supplement (doi:10.1039/d4qi01092b), 2024-01-01
Supplement: d4qi01092b1.pdf [file d4qi01092b1.pdf]

## Electronic Supplementary Information

### **Fabrication of high-surface-area mesoporous frameworks of $\beta$ -Ni(OH)<sub>2</sub>-CdIn<sub>2</sub>S<sub>4</sub> p-n nano-heterojunctions for improved visible light photocatalytic hydrogen production**

Evangelos K. Andreou, Ioannis Vamvasakis and Gerasimos S. Armatas\*  
*Department of Materials Science and Engineering, University of Crete, Heraklion 70013, Greece*

\*E-mail: [garmatas@materials.uoc.gr](mailto:garmatas@materials.uoc.gr)

## Supporting Tables

**Table S1.** Elemental composition of mesoporous CIS and Ni-modified CIS NCFs, and 10% Ni-modified CIS microparticles.

| Sample              | Cd (at%) | In (at%) | S (at%) | Ni (at%) | Ni loading <sup>a)</sup> (wt%) |
|---------------------|----------|----------|---------|----------|--------------------------------|
| CIS NCFs            | 15.50    | 29.90    | 54.60   | -        | -                              |
| 5-Ni/CIS NCFs       | 15.13    | 27.30    | 50.63   | 6.94     | 5.40                           |
| 7-Ni/CIS NCFs       | 14.12    | 28.10    | 48.98   | 8.80     | 7.22                           |
| 10-Ni/CIS NCFs      | 13.00    | 26.74    | 48.65   | 11.61    | 10.02                          |
| 15-Ni/CIS NCFs      | 12.67    | 24.86    | 44.40   | 18.07    | 15.11                          |
| 10-Ni/CIS- <i>m</i> | 13.07    | 26.68    | 48.33   | 11.92    | 10.20                          |

<sup>a)</sup> Based on the EDS Ni to Cd atomic ratio.

**Table S2.** Photocatalytic efficiency comparison of several thiospinel-based photocatalysts.

| Photocatalyst                                                                           | Reaction Conditions                                                              | Light Source                           | H <sub>2</sub> evolution rate |                                          | Quantum Efficiency (QE) | Ref. |
|-----------------------------------------------------------------------------------------|----------------------------------------------------------------------------------|----------------------------------------|-------------------------------|------------------------------------------|-------------------------|------|
|                                                                                         |                                                                                  |                                        | ( $\mu\text{mol h}^{-1}$ )    | ( $\mu\text{mol g}^{-1} \text{h}^{-1}$ ) |                         |      |
| 3 wt.% Pt/5 wt.% Co <sub>9</sub> S <sub>8</sub> /CdIn <sub>2</sub> S <sub>4</sub>       | 50 mg catalyst, 20% v/v TEOA                                                     | 300 W Xe lamp ( $\lambda \geq 420$ nm) | 54                            | 1083.6                                   | 5.5% at 420 nm          | 1    |
| CdIn <sub>2</sub> S <sub>4</sub> @CoAl-LDH                                              | 2 mg catalyst, 10% v/v TEOA                                                      | 300 W Xe lamp ( $\lambda \geq 420$ nm) | 1.6                           | 793.4                                    | 0.2% at 450 nm          | 2    |
| CdIn <sub>2</sub> S <sub>4</sub> /In(OH) <sub>3</sub> /Zn <sub>2</sub> GeO <sub>4</sub> | 50 mg catalyst, 0.35 M Na <sub>2</sub> S, 0.25 M Na <sub>2</sub> SO <sub>3</sub> | 300 W Xe lamp ( $\lambda \geq 420$ nm) | 71                            | 1426.90                                  | 9.1% at 420 nm          | 3    |
| 1 wt.% MoS <sub>2</sub> /CdIn <sub>2</sub> S <sub>4</sub>                               | 50 mg catalyst, 0.35 M Na <sub>2</sub> S, 0.25 M Na <sub>2</sub> SO <sub>3</sub> | 300 W Xe lamp ( $\lambda \geq 420$ nm) | 47.3                          | 2365                                     | 5.2% at 400 nm          | 4    |
| CdIn <sub>2</sub> S <sub>4</sub> /In(OH) <sub>3</sub> /NiCr-LDH                         | 50 mg catalyst, 0.35 M Na <sub>2</sub> S, 0.25 M Na <sub>2</sub> SO <sub>3</sub> | 300 W Xe lamp ( $\lambda \geq 420$ nm) | 54.65                         | 1093                                     | 1.7% at 420 nm          | 5    |
| CdIn <sub>2</sub> S <sub>4</sub> /rGO/ZnS QDs                                           | 50 mg catalyst, 6% v/v TEOA                                                      | 300 W Xe lamp ( $\lambda \geq 420$ nm) | 341                           | 6820                                     | 19.3% at 430 nm         | 6    |
| CdIn <sub>2</sub> S <sub>4</sub> /CNFs/Co <sub>4</sub> S <sub>3</sub>                   | 50 mg catalyst, 20% v/v lactic acid                                              | 300 W Xe lamp ( $\lambda \geq 420$ nm) | 1293.5                        | 25870                                    | 16.3% at 420 nm         | 7    |
| CdIn <sub>2</sub> S <sub>4</sub> /ZnS                                                   | 20 mg catalyst, 0.35 M Na <sub>2</sub> S, 0.25 M Na <sub>2</sub> SO <sub>3</sub> | 300 W Xe lamp                          | 74.8                          | 3743                                     | 2.2% at 365 nm          | 8    |
| CdIn <sub>2</sub> S <sub>4</sub> /ZnIn <sub>2</sub> S <sub>4</sub>                      | 4 mg catalyst, 0.35 M Na <sub>2</sub> S, 0.25 M Na <sub>2</sub> SO <sub>3</sub>  | 300 W Xe lamp ( $\lambda \geq 420$ nm) | 50.7                          | 12670                                    | 18.7% at 420 nm         | 9    |
| Co-Pi/CdIn <sub>2</sub> S <sub>4</sub>                                                  | 10 mg catalyst, 20% v/v MeOH                                                     | 500 W Xe lamp ( $\lambda \geq 420$ nm) | 72.8                          | 7280                                     | 14.1% at 405 nm         | 10   |
| Ni <sub>12</sub> P <sub>5</sub> /CdIn <sub>2</sub> S <sub>4</sub>                       | 30 mg catalyst, 10% v/v TEOA                                                     | 300 W Xe lamp ( $\lambda \geq 420$ nm) | 150.3                         | 5010                                     | 23.5% at 400 nm         | 11   |
| Ni <sub>2</sub> P/ZnIn <sub>2</sub> S <sub>4</sub>                                      | 50 mg catalyst, 10% v/v lactic acid                                              | 300 W Xe lamp ( $\lambda > 400$ nm)    | 103.3                         | 2066                                     | 7.7% at 420 nm          | 12   |
| CoP/ZnIn <sub>2</sub> S <sub>4</sub>                                                    | 20 mg catalyst, 0.35 M Na <sub>2</sub> S, 0.25 M Na <sub>2</sub> SO <sub>3</sub> | 300 W Xe lamp ( $\lambda \geq 420$ nm) | 175.5                         | 8775                                     | 24.1% at 420 nm         | 13   |
| Pt/Cu <sub>3</sub> P/ZnIn <sub>2</sub> S <sub>4</sub>                                   | 50 mg catalyst, 0.35 M Na <sub>2</sub> S,                                        | 300 W Xe lamp ( $\lambda \geq 420$ nm) | 128                           | 2561                                     | 22.3% at 420 nm         | 14   |

|                                                                        |                                                                                        |                                         |            |              |                             |                      |
|------------------------------------------------------------------------|----------------------------------------------------------------------------------------|-----------------------------------------|------------|--------------|-----------------------------|----------------------|
|                                                                        | 0.25 M Na <sub>2</sub> SO <sub>3</sub>                                                 |                                         |            |              |                             |                      |
| Ni <sub>12</sub> P <sub>5</sub> /ZnIn <sub>2</sub> S <sub>4</sub>      | 50 mg catalyst,<br>0.35 M Na <sub>2</sub> S,<br>0.25 M Na <sub>2</sub> SO <sub>3</sub> | 300 W Xe lamp<br>(λ≥420 nm)             | 113        | 2263         | 20.5% at<br>420 nm          | 15                   |
| CoP@ZnIn <sub>2</sub> S <sub>4</sub>                                   | 10 mg catalyst,<br>10% v/v TEOA                                                        | 300 W Xe lamp<br>(λ≥420 nm)             | 103        | 10300        | 16.2% at<br>420 nm          | 16                   |
| 15 wt.% Ni <sub>2</sub> P/CdIn <sub>2</sub> S <sub>4</sub>             | 20 mg catalyst,<br>10% v/v TEOA                                                        | 300 W Xe lamp<br>(λ≥420 nm)             | 586        | 29300        | 61.7%<br>at 420 nm          | 17                   |
| <b>10 wt.% β-Ni(OH)<sub>2</sub>/<br/>CdIn<sub>2</sub>S<sub>4</sub></b> | <b>20 mg catalyst,<br/>10% v/v<br/>TEOA</b>                                            | <b>300 W Xe<br/>lamp (λ≥420<br/>nm)</b> | <b>395</b> | <b>19750</b> | <b>52.0 % at<br/>420 nm</b> | <b>This<br/>work</b> |

**Table S3.** Nyquist equivalent circuit fitted parameters of the prepared materials.

| Sample                | R <sub>s</sub> (Ω) | C <sub>dl</sub> (F)    | R <sub>ct</sub> (Ω) | χ <sup>2</sup>          |
|-----------------------|--------------------|------------------------|---------------------|-------------------------|
| CIS NCFs              | 12.46              | 46 × 10 <sup>-6</sup>  | 565                 | 3.60 × 10 <sup>-3</sup> |
| 5-Ni/CIS NCFs         | 14.72              | 185 × 10 <sup>-6</sup> | 346                 | 1.95 × 10 <sup>-4</sup> |
| 7-Ni/CIS NCFs         | 13.51              | 195 × 10 <sup>-6</sup> | 265                 | 3.06 × 10 <sup>-3</sup> |
| 10-Ni/CIS NCFs        | 12.19              | 144 × 10 <sup>-6</sup> | 238                 | 4.16 × 10 <sup>-3</sup> |
| 15-Ni/CIS NCFs        | 12.70              | 221 × 10 <sup>-6</sup> | 373                 | 2.16 × 10 <sup>-3</sup> |
| 10-Ni/CIS- <i>m</i>   | 13.79              | 58 × 10 <sup>-6</sup>  | 1104                | 3.53 × 10 <sup>-3</sup> |
| β-Ni(OH) <sub>2</sub> | 13.36              | 39 × 10 <sup>-6</sup>  | 3437                | 3.13 × 10 <sup>-3</sup> |

## Supporting Figures

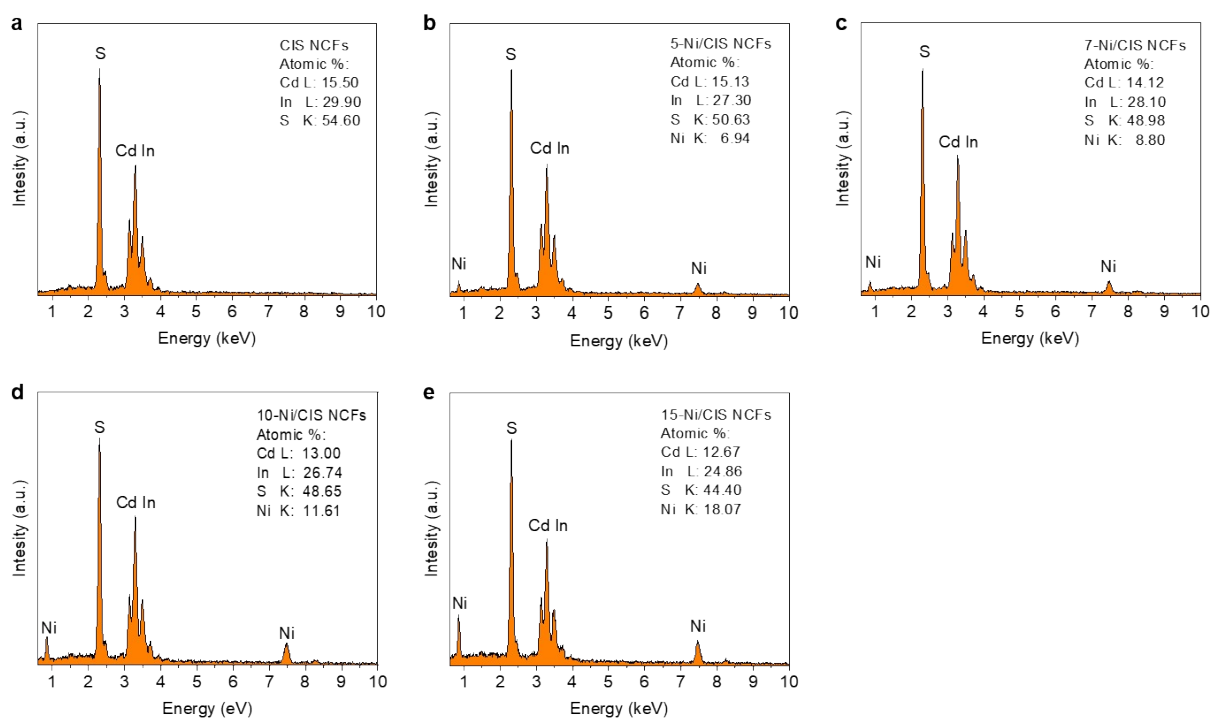

**Fig. S1** Typical EDS spectra of the mesoporous CIS and Ni-modified CIS NCFs materials.

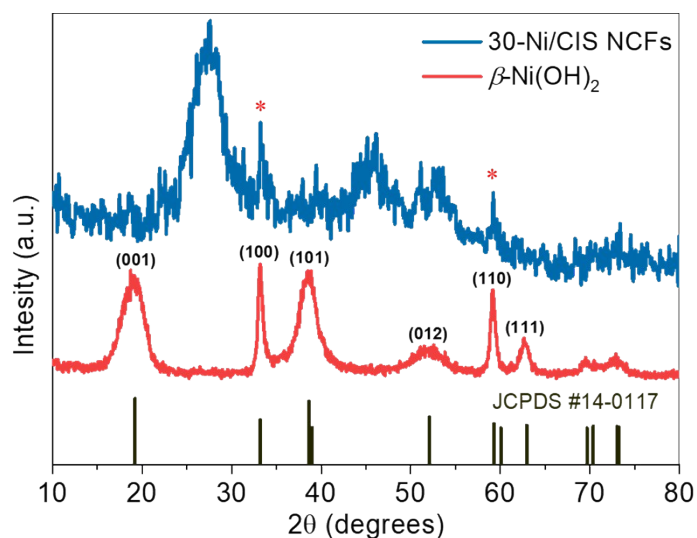

**Fig. S2** XRD patterns of the as-prepared 30 wt.% Ni-loaded CIS (30-Ni/CIS NCFs) and isolated  $\beta$ -Ni(OH)<sub>2</sub> microparticles. The diffraction peaks at  $2\theta = 33^\circ$  and  $59^\circ$  scattering angles (marked with symbol \*) in the XDR pattern of 30-Ni/CIS NCFs can be attributed to the (100) and (110) reflections of the hexagonal  $\beta$ -Ni(OH)<sub>2</sub> structure. The XRD pattern of the as-prepared  $\beta$ -Ni(OH)<sub>2</sub> microparticles is consistent with the standard diffraction pattern of hexagonal  $\beta$ -Ni(OH)<sub>2</sub> (JCPDS card no. 14-0117).

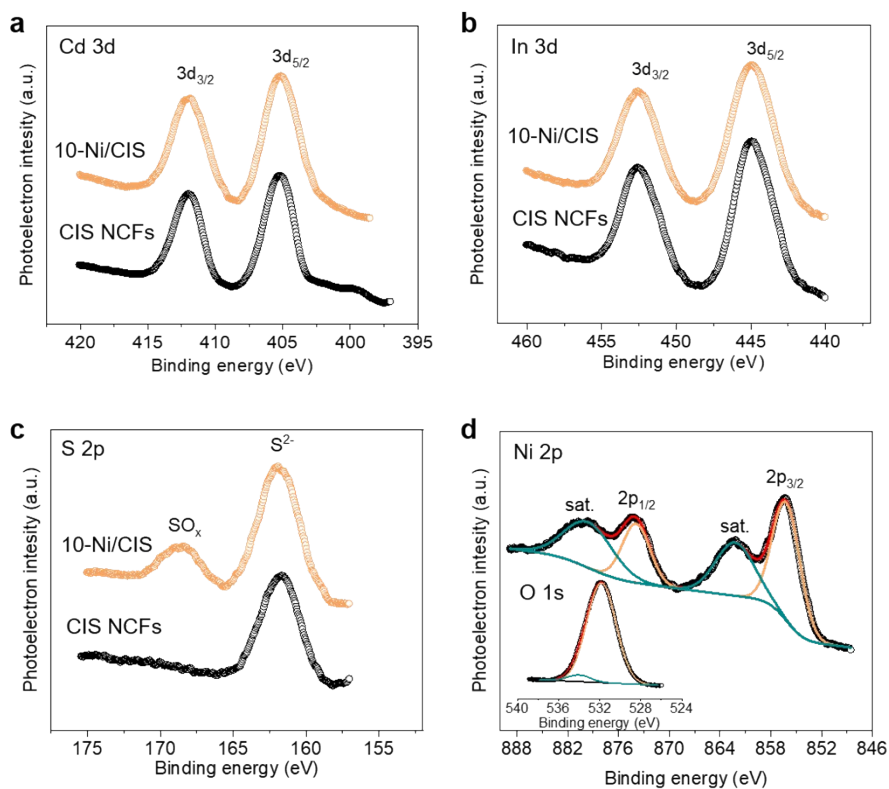

**Fig. S3** Typical XPS core-level spectra of the (a) Cd 3d, (b) In 3d, (c) S 2p, and (b) Ni 2p and O 1s (inset) regions of mesoporous CIS and 10-Ni/CIS NCFs catalysts.

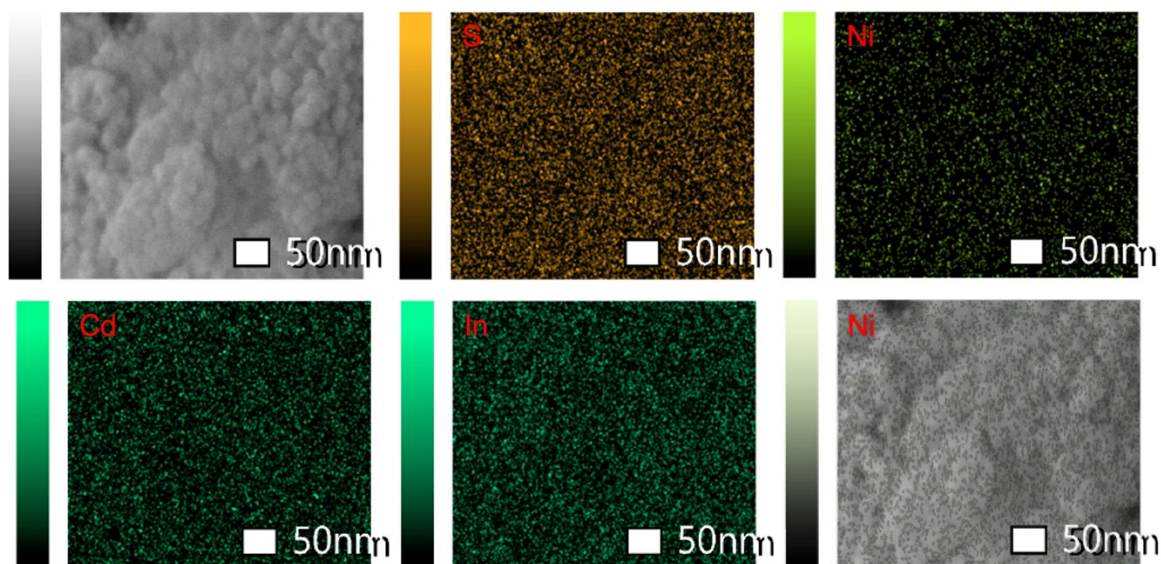

**Fig. S4** EDS elemental mapping of 10-Ni/CIS NCFs catalyst. The homogeneous distribution of Ni atoms (green spots in the lower-right panel) on the surface of the catalyst is also depicted.

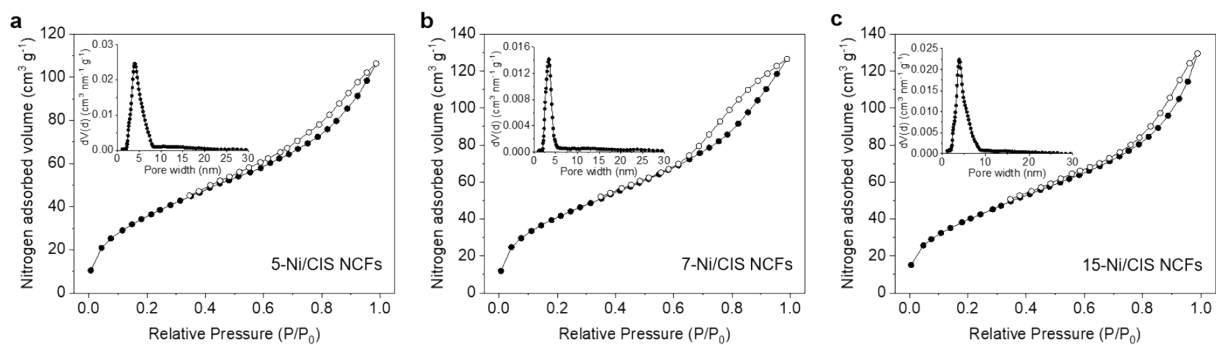

**Fig. S5** Nitrogen adsorption (filled cycles) and desorption (open cycles) isotherms at  $-196\text{ }^{\circ}\text{C}$  for the Ni-modified CIS samples with 5, 7 and 15 wt.% Ni content. Insets: The corresponding NLDFT pore-size distribution plots derived from the adsorption isotherms.

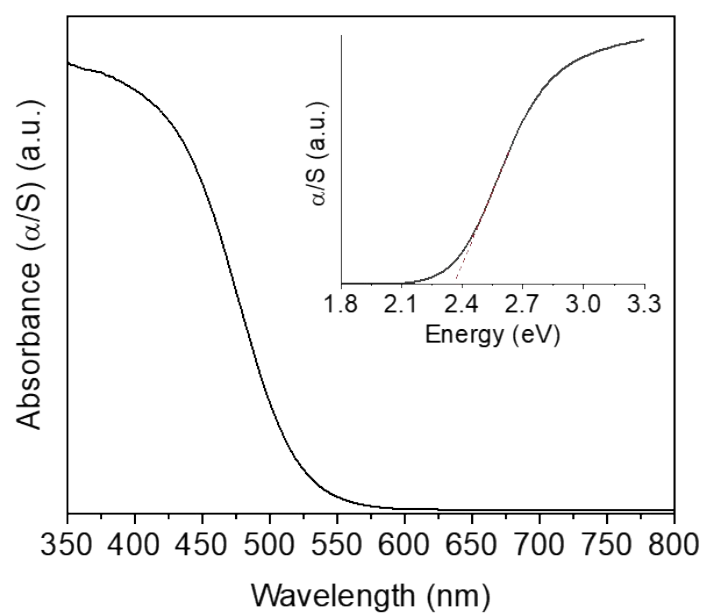

**Fig. S6** UV-vis spectrum of bulk CIS. Inset: the corresponding Kubelka-Munk plot showing an energy bandgap of 2.36 eV.

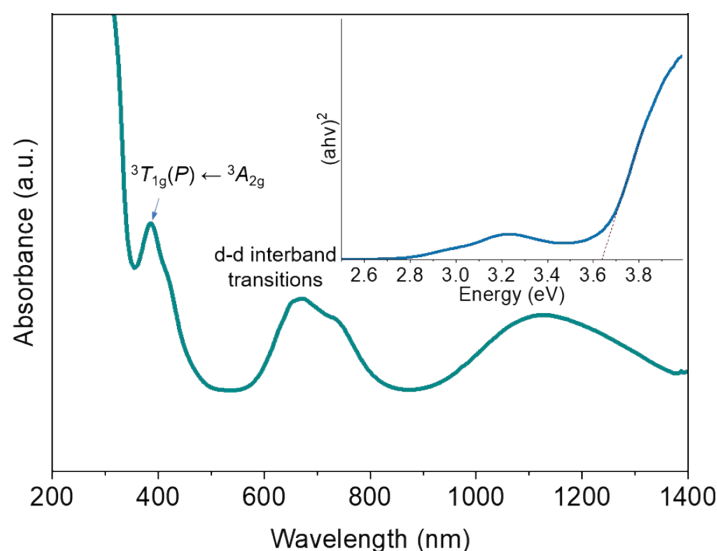

**Fig. S7** UV-vis/NIR spectrum of the as-prepared  $\beta$ -Ni(OH)<sub>2</sub> microparticles, showing the characteristic d-d interband transitions at  $\sim$ 385,  $\sim$ 670 and  $\sim$ 1120 nm. The steep absorption below 350 nm corresponding to the band-gap transition. Inset: the corresponding Tauc plot for direct band gap semiconductor, showing an energy bandgap of  $\sim$ 3.65 eV.

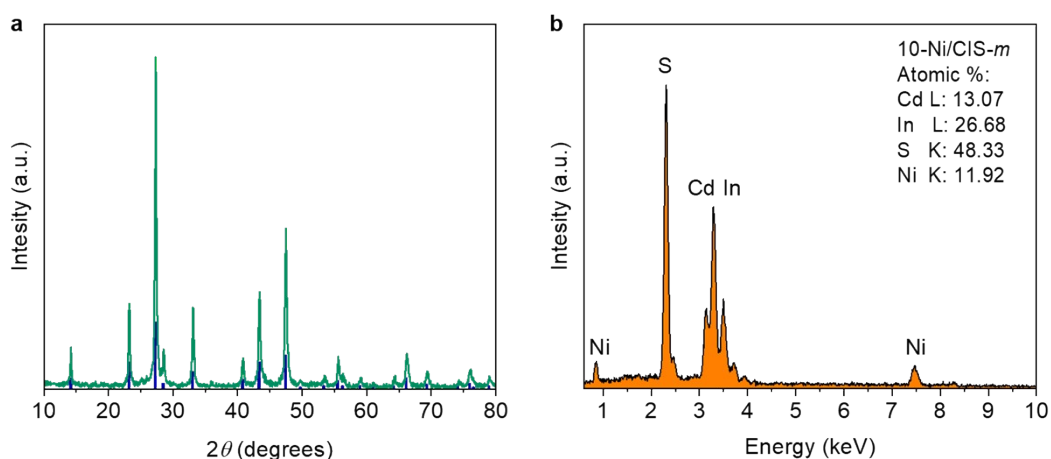

**Fig. S8** Typical (a) XRD pattern and (b) EDS spectrum of bulk 10-Ni/CIS-*m*. In panel (a), the blue lines correspond to the standard diffraction of cubic CdIn<sub>2</sub>S<sub>4</sub> (space group: Fd3m), according to JCPDS card no. 27-0060. The EDS data give a Ni content of 10.2 wt.%.

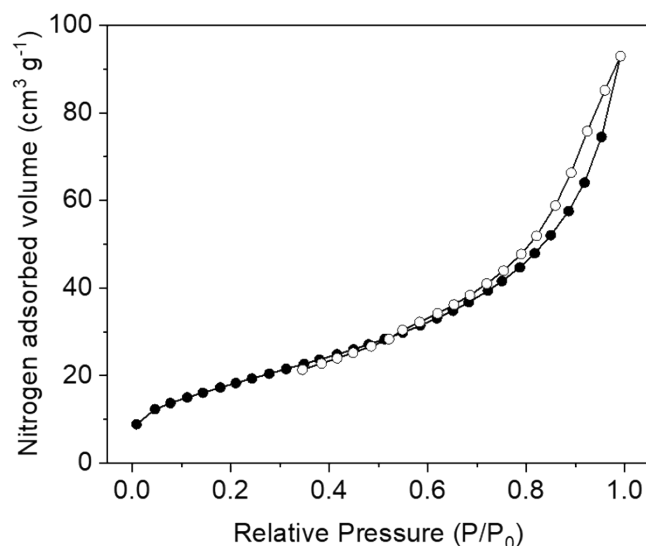

**Fig. S9** Nitrogen adsorption (filled cycles) and desorption (open cycles) isotherms at  $-196\text{ }^{\circ}\text{C}$  for the bulk 10-Ni/CIS-*m* reference material.

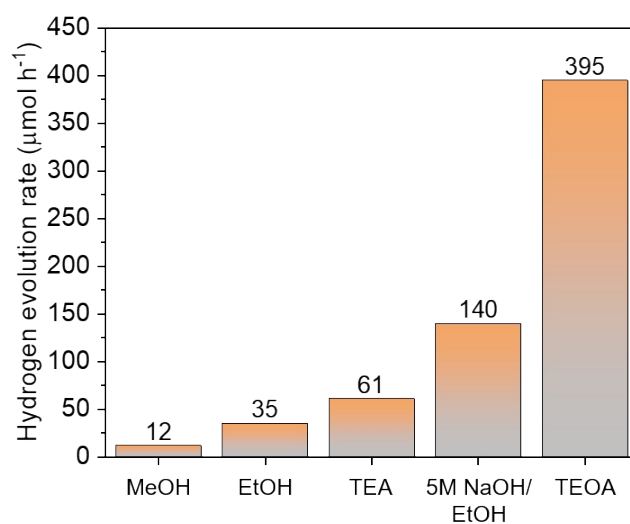

**Fig. S10** Hydrogen evolution activity of the 10-Ni-CIS NCFs photocatalyst, using different sacrificial reagents: methanol (MeOH, 10% v/v), ethanol (EtOH, 10% v/v), triethylamine (TEA, 10% v/v), 5M NaOH/Ethanol (EtOH, 10% v/v) and triethanolamine (TEOA, 10% v/v). Reaction conditions: 20 mg of photocatalyst was dispersed in a 20 mL aqueous solution containing the respective hole scavenger, 300-W Xe-lamp equipped with a UV-cut off filter ( $\lambda \geq 420\text{ nm}$ ).



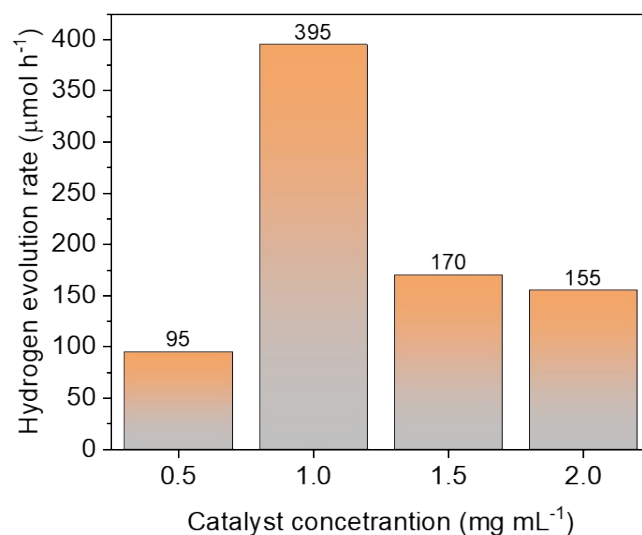

**Fig. S11** Hydrogen evolution activity of 10-Ni-CIS NCFs photocatalysts, using different catalyst loading. Reaction conditions: 10-40 mg of catalyst was dispersed in a 20 mL aqueous solution of TEOA (10% v/v), 300-W Xe-lamp equipped with a UV-cut off filter ( $\lambda \geq 420$  nm).

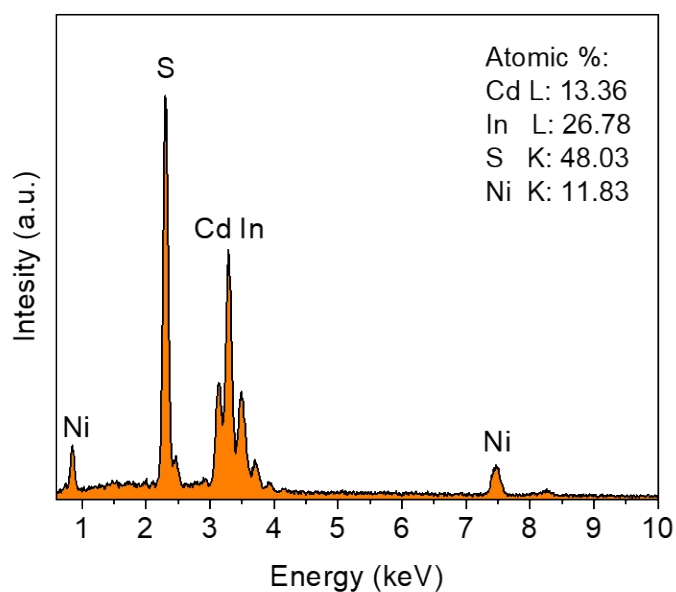

**Fig. S12** Typical EDS spectrum of the reused 10-Ni/CIS NCFs catalyst. The EDS analysis gives a 9.95 wt.% Ni content.

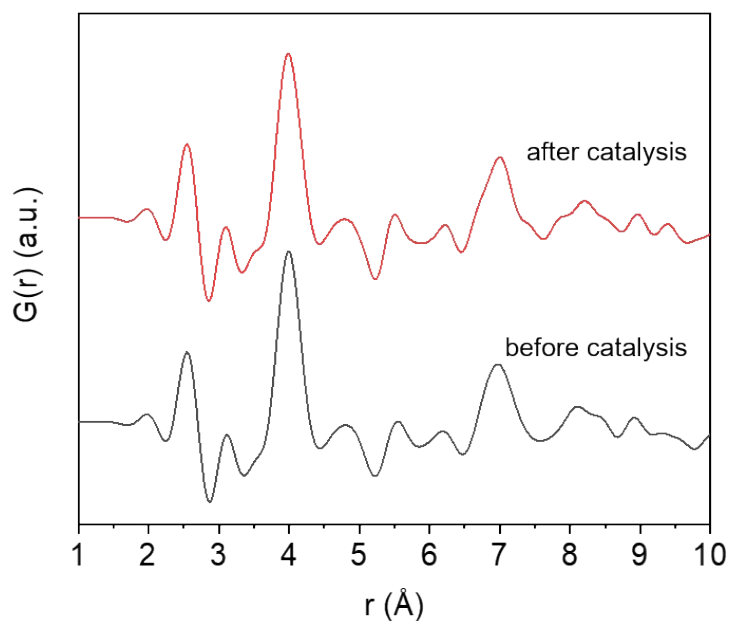

**Fig. S13** Reduced atomic pair distribution function  $G(r)$  plots of the 10-Ni/CIS NCFs before and after photocatalysis. The reused 10-Ni/CIS NCFs catalyst exhibits a PDF profile nearly identical to that of the fresh sample, indicating a similar atomic structure.

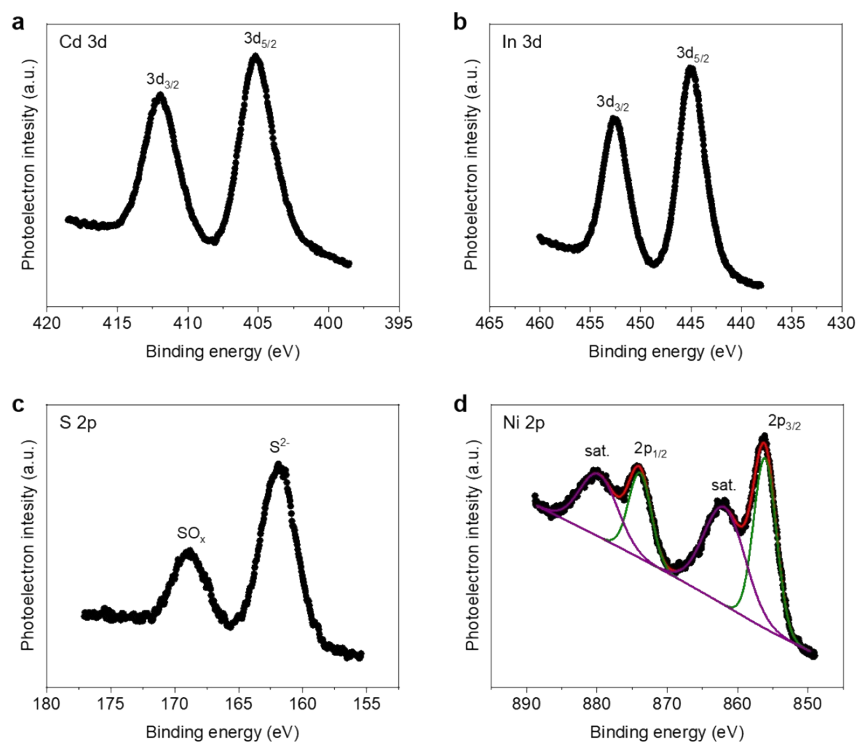

**Fig. S14** Typical XPS spectra of a) Cd 3d, b) In 3d, c) S 2p and d) Ni 2p of the 10-Ni/CIS NFAs photocatalyst after four-five hours catalytic runs.

The Cd 3d XPS spectrum of the reused photocatalyst (10-Ni/CIS NCFs) shows a doublet peak at 405.1 and 411.9 eV, corresponding to the Cd 3d<sub>5/2</sub> and Cd 3d<sub>3/2</sub> spin-orbits of Cd<sup>2+</sup>, respectively. Meanwhile, the In 3d XPS spectrum reveals photoelectron signals attributed to the In 3d<sub>5/2</sub> (445.0 eV) and In 3d<sub>3/2</sub> (452.5 eV) spin-orbit components of In<sup>3+</sup> cations in CdIn<sub>2</sub>S<sub>4</sub>. In the S 2p XPS spectrum, the signal at 161.9 eV corresponds to the S<sup>2-</sup> valence state, whereas the broad peak at 168.8 eV arises from surface

SO<sub>x</sub> species. In the Ni 2p XPS region, two prominent peaks of Ni 2p<sub>3/2</sub> and Ni 2p<sub>1/2</sub> are observed at 856.1 and 873.9 eV, respectively, attributed to Ni<sup>2+</sup> cations in Ni(OH)<sub>2</sub>. Additionally, the presence of strong satellite signals at 861.9 and 879.7 eV further confirms the paramagnetic nature of Ni(II).

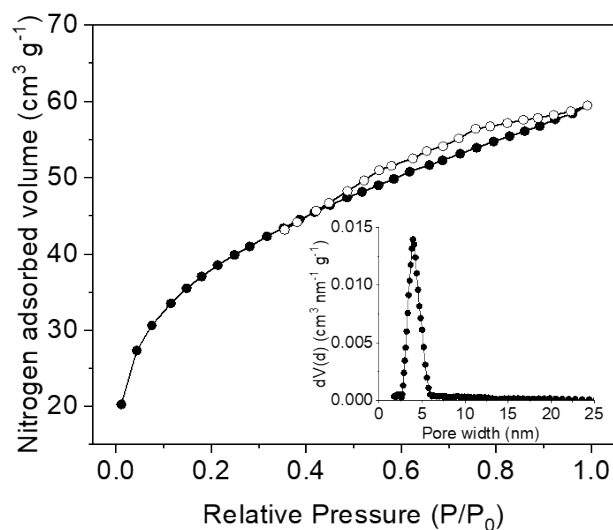

**Fig. S15** N<sub>2</sub> adsorption and desorption isotherms at  $-196\text{ }^{\circ}\text{C}$  of the 10-Ni/CIS NCFs catalyst after 20 h photocatalytic test. Analysis of the adsorption data gives a surface area of  $133\text{ m}^2\text{ g}^{-1}$ , a total pore volume of  $0.1\text{ cm}^3\text{ g}^{-1}$  and an average pore width of  $4.0\text{ nm}$ .

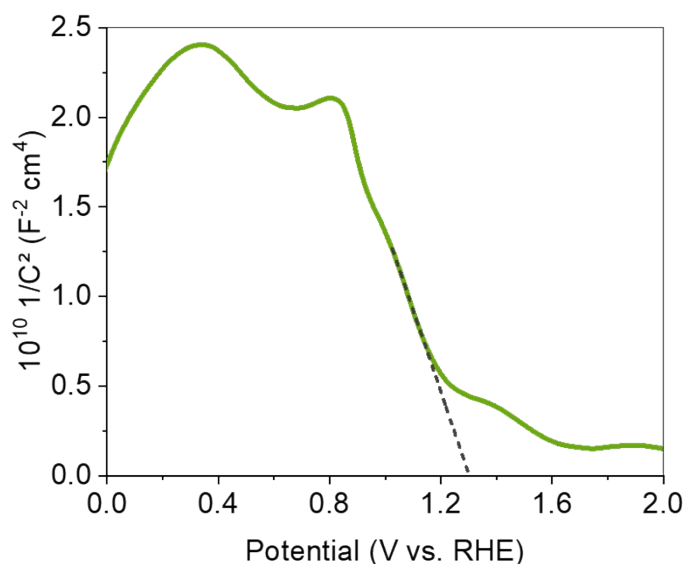

**Fig. S16** Mott-Schottky plot for the as-prepared  $\beta\text{-Ni(OH)}_2$  microparticles. The linear fit to the data (dashed line) gives a  $E_{\text{FB}}$  of  $\sim 1.30\text{ V}$  (vs RHE) at pH 7, while the positive slope indicates p-type conductivity. Given an energy bandgap of  $3.65\text{ eV}$ , the conduction band energy ( $E_{\text{C}}$ ) of  $\beta\text{-Ni(OH)}_2$  was calculated as  $-2.35\text{ V}$  (vs RHE) at pH 7.

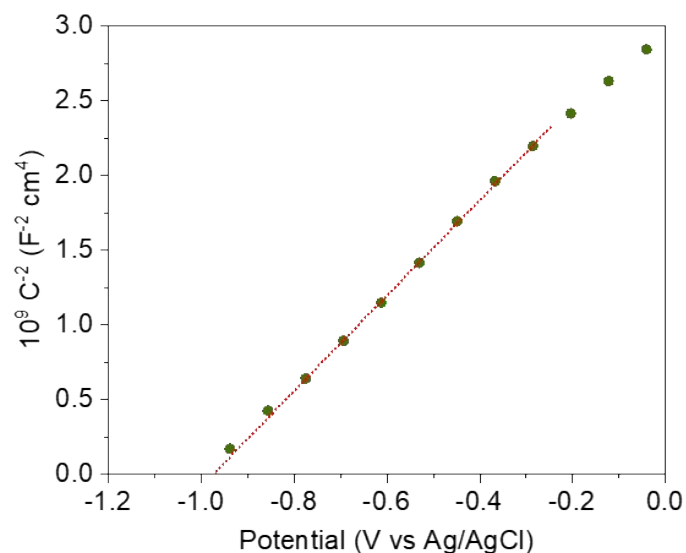

**Fig. S17** Mott-Schottky plot for the bulk CIS. The linear fit to the data (red dashed line) gives a  $E_{FB}$  of  $-0.77$  V (vs RHE) at pH 7 and a donor concentration ( $N_D$ ) of  $\sim 6.6 \times 10^{17} cm^{-3}$ .

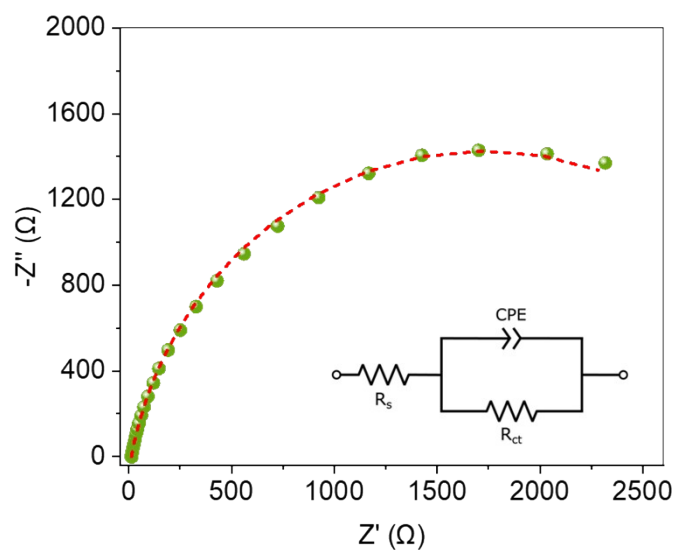

**Fig. S18** Nyquist plot (Inset: equivalent circuit model used to fit the EIS data) of the  $\beta$ -Ni(OH)<sub>2</sub> microparticles. The red line is fit of the experimental data. The fitting analysis yielded a charge-transfer resistance ( $R_{ct}$ ) of 3437 ohm.

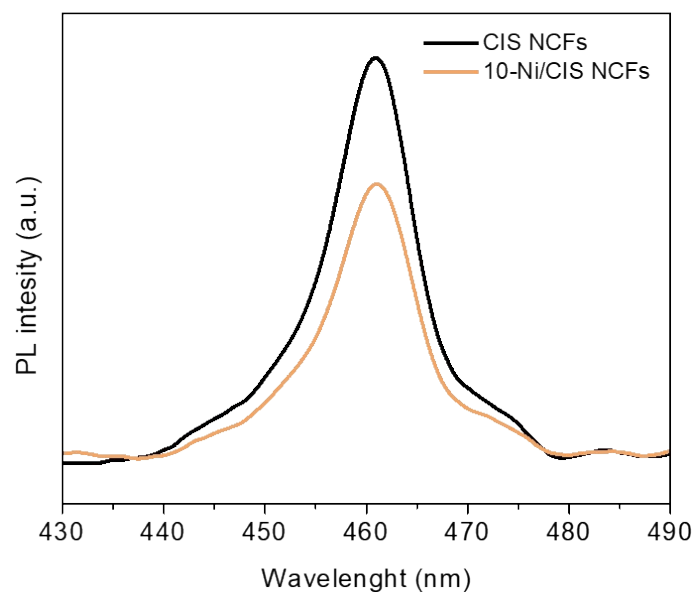

**Fig. S19** Room temperature PL emission spectra of the mesoporous CIS and 10-Ni/CIS NCFs. PL experiments were carried out in water ( $1 \text{ mg mL}^{-1}$ ) under 375 nm excitation wavelength.

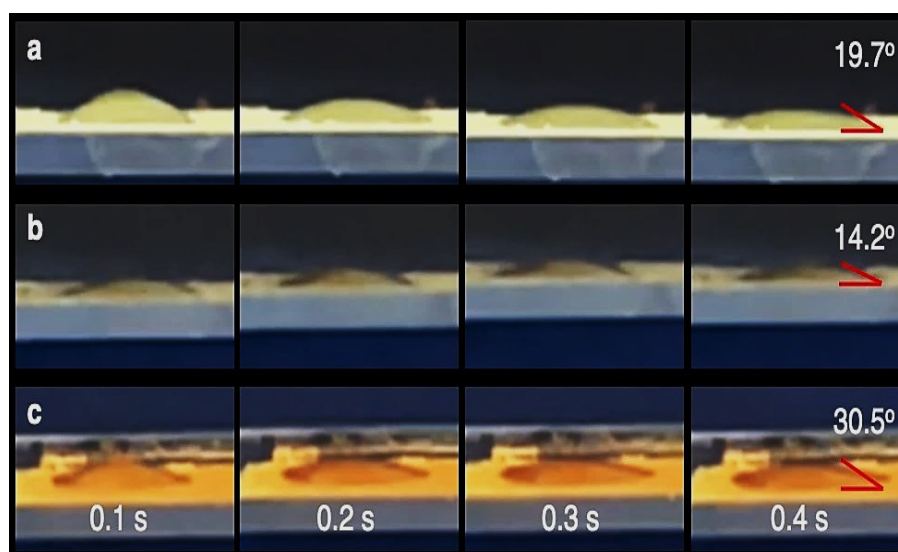

**Fig. S20** Contact angle measurements of the mesoporous (a) CIS and (b) 10-Ni/CIS NCFs, and (c) bulk 10-Ni/CIS-*m*. The diameter of the water droplet was approximately 2 nm.

## References

- (1) C. Li, Y. Zhao, X. Liu, P. Huo, Y. Yan, L. Wang, G. Liao and C. Liu, *J. Colloid Interface Sci.*, 2021, **600**, 794–803.
- (2) L. Peng, C. Yu, Y. Ma, G. Xie, X. Xie, Z. Wu and N. Zhang, *Inorg. Chem. Front.*, 2022, **9**, 994–1005.
- (3) X. Li, X. Yan, N. Zhao, J. Zhao, B. Lu, X. Zhang, X. Zhang and H. Yu, *J. Photochem. Photobiol. A*, 2018, **360**, 298–305.
- (4) Y. T. Prabhu, R. Kumari, A. Gautam, B. Sreedhar and U. Pal, *Nano-Structures & Nano-Objects*, 2021, **26**, 100682.
- (5) R. Fu, Y. Gong, C. Li, L. Niu and X. Liu, *Nanomaterials*, 2021, **11**, 3122.
- (6) C. Xue, H. An, X. Yan, J. Li, B. Yang, J. Wei and G. Yang, *Nano Energy*, 2017, **39**, 513–523.
- (7) S. Guo, Y. Li, C. Xue, Y. Sun, C. Wu, G. Shao and P. Zhang, *Chem. Eng. J.*, 2021, **419**, 129213.
- (8) L. Xie, G. Liu, R. Suo, Z. Xie, H. Liu, J. Chen, J. Chen and C.-Z. Lu, *J. Alloys Compd.*, 2023, **948**, 169692.
- (9) X. Dang, M. Xie, F. Dai, J. Guo, J. Liu and X. Lu, *J. Mater. Chem. A*, 2021, **9**, 14888–14896.
- (10) J. Xu, Q. Li, D. Sui, W. Jiang, F. Liu, X. Gu, Y. Zhao, P. Ying, L. Mao, X. Cai and J. Zhang, *Nanomaterials*, 2023, **13**, 420.
- (11) W. Yang, S. S. Xu, Y. Niu, Y. Zhang and J. Xu, *J. Phys. Chem. C*, 2023, **127**, 4853–486.
- (12) X. Li Li, X. J. Wang, J. Y. Zhu, Y. P. Li, J. Zhao and F. T. Li, *Chem. Eng. J.*, 2018, **353**, 15–24.
- (13) Z. Xiang, H. Guan, B. Zhang and Y. Zhao, *J. Am. Ceram. Soc.*, 2021, **104**, 504–513.
- (14) Z. Yang, L. Shao, L. Wang, X. Xia, Y. Liu, S. Cheng, C. Yang and S. Li, *Int. J. Hydrogen Energy*, 2020, **45**, 14334–14346.
- (15) D. Zeng, Z. Lu, X. Gao, B. Wu and W. J. Ong, *Catal. Sci. Technol.*, 2019, **9**, 4010–4016.
- (16) B. Wu, N. Liu, L. Lu, R. Zhang, R. Zhang, W. Shi and P. Cheng, *Chem. Commun.*, 2022, **58**, 6622–6625.
- (17) E. K. Andreou, I. Vamvasakis and G. S. Armatas, *Adv. Mater. Interfaces*, 2024, **11**, 2300994.
